# Supplementary material for: H3K9me3 maintenance on a human artificial chromosome is required for segregation but not centromere epigenetic memory
Source: PubMed Central journal article supplement (PMC7390644; doi:10.1242/jcs.242610), 2020-07-24
Supplement: joces-133-242610-s1.pdf [file joces-133-242610-s1.pdf]

### A HAC no. per cell no HAC selection

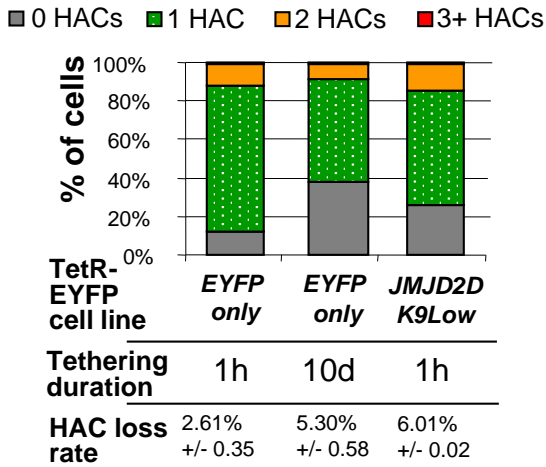

### B + Dox

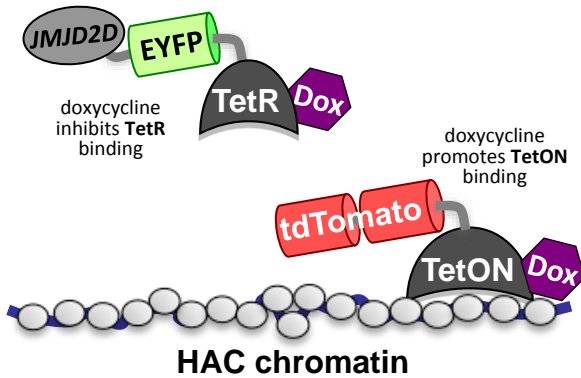

### No Dox

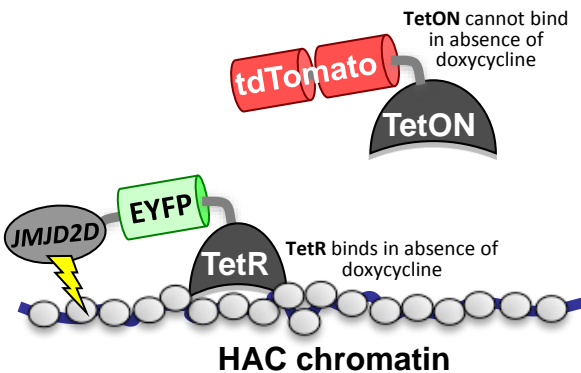

### C Metaphase phenotypes

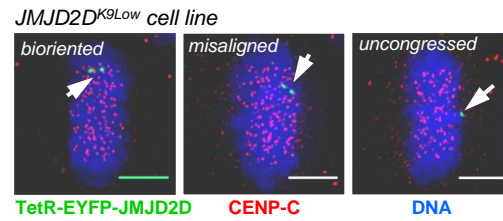

### D Metaphase defects

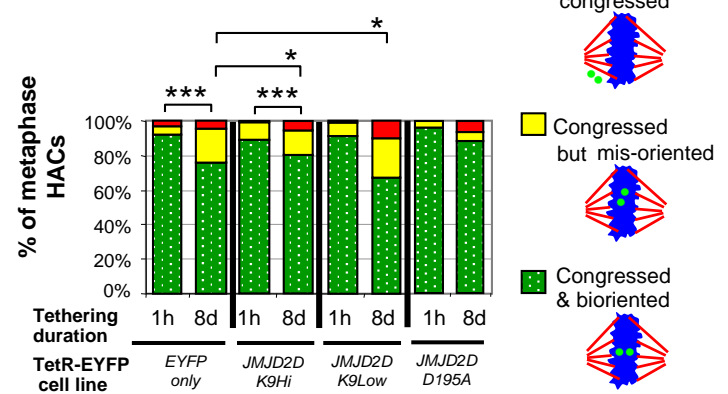

### E Endogenous CENP-A levels on canonical centromeres

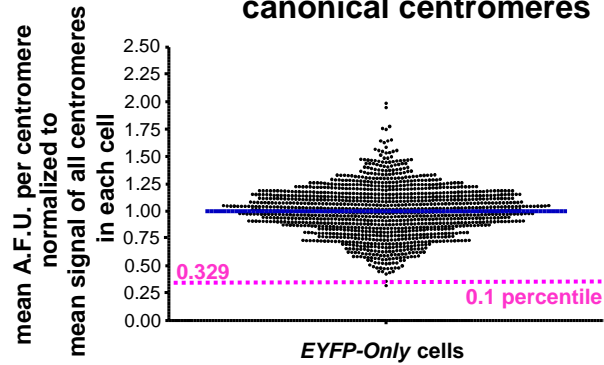

Figure S1

**Characterization of *JMJD2D*<sup>K9Low</sup> cell line and metaphase phenotypes under *JMJD2D* tethering**

- A) Efficiency of HAC segregation of each cell line, in absence of selection markers. We compared the stability of our *EYFP-only* control cell line, in absence and presence of tethering, as well as *JMJD2D*<sup>K9Low</sup>'s HAC stability, without any G418 HAC selection in the culture medium. After the allotted time had passed, we counted HAC number per cell across the cell population. Based on that, we calculated HAC loss ratio (Nakano et al., 2008) for each of these cell lines. Sum of 2 biological repeats, n≥127 interphase cells each.
- B) Strategy for HAC detection under +doxycycline conditions. TetON binds to TetO DNA sequences only in the presence of doxycycline, thus allowing detection and visualization of the HAC by microscopy when the *JMJD2D* construct is not tethered.
- C) Example of criteria used for different HAC phenotypes observed in metaphase, immunofluorescence. Scale bar: 5 μm.
- D) Long-term *JMJD2D* tethering causes only mild metaphase defects, in both *JMJD2D*<sup>K9Hi</sup> and *JMJD2D*<sup>K9Low</sup> cells. Immunofluorescence in fixed metaphase cells, sum of 2 biological repeats, n≥100 cells each. Statistical test: Fisher's exact test.
- E) Distribution of CENP-A signal levels in endogenous centromeres. A critically low level of CENP-A, for the purposes of analysing reductions of HAC CENP-A levels in individual HACs, was defined as being below the 0.1 percentile in the normal CENP-A distribution found in centromeres of HeLa-OHAC-2-4 cells, under normal conditions. Immunofluorescence in fixed metaphase cells, sum of 2 biological repeats, n≥19 cells each, total of 1260 individual centromeres quantified.

### A HAC H3K9me3 levels

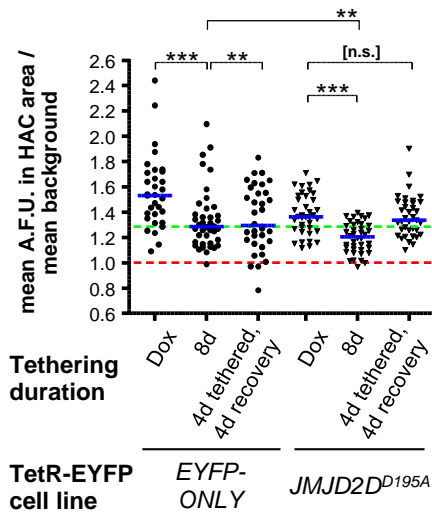

### B HAC segregation defects

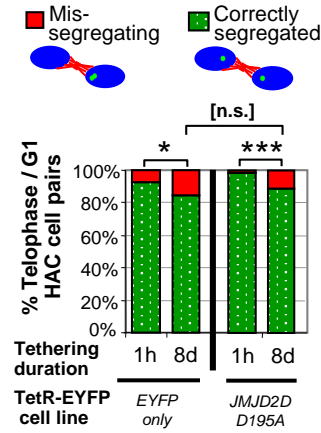

### C HAC CENP-A

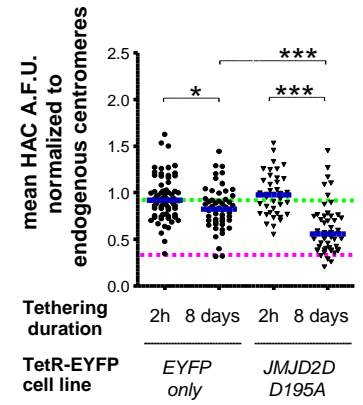

### D Metaphase defects

4 days transient transfection

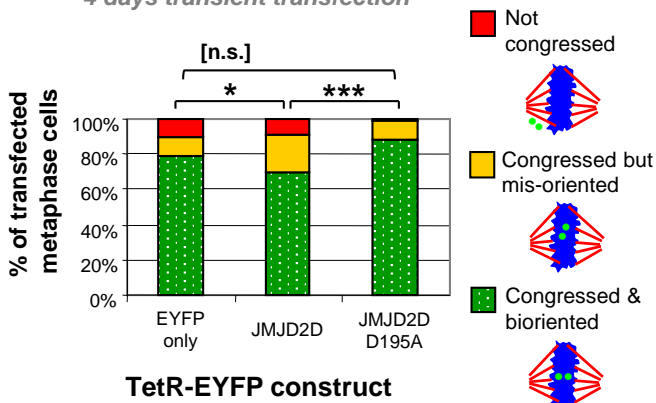

## Figure S2

### Characterization of HAC H3K9me3 levels in *JMJD2D<sup>D195A</sup>* cell line

- A) Quantification of HAC long-term H3K9me3 removal in *JMJD2D-D195A* cells. Additional data from experiment shown in Fig. 2A,B. Doxycycline was washed out of the cell medium and cells were allowed to grow for 8 days. On the penultimate day, all cultures were transiently transfected with a plasmid expressing TetON-tdTomato, to allow visualization of HAC under doxycycline. Mean HAC-associated H3K9me3 immunofluorescence signal was quantified: 2 biological repeats,  $n > 11$ -20 transfected interphase cells each, median (blue bar), red dotted line indicates mean background level, green dotted line indicates median initial levels of HAC H3K9me3 levels after tethering of control TetR-EYFP. Statistical test: Mann-Whitney U.
- B) Quantification of HAC mitotic segregation in *JMJD2D<sup>D195A</sup>* cells. Additional data from experiment shown in Fig. 2E. Doxycycline was washed out of the cell medium and cells were allowed to grow for 8 days. HAC phenotypes in fixed post-segregation (ie. Telophase or early G1) cells were separately quantified. Sum of 2 biological repeats,  $n \geq 97$  cells each. Statistical test: Fisher's exact test.
- C) Quantification of HAC CENP-A levels in *JMJD2D<sup>D195A</sup>* cells. Additional data from experiment shown in Fig. 2D. Total of 2 biological repeats,  $n \geq 16$  cells each. Blue bars denote median, green dotted line indicates median starting levels of control *EYFP-only* HAC CENP-A, magenta dotted line indicates 32,9% of the median endogenous CENP-A level. Statistical test: Mann-Whitney U.
- D) Transient transfection of *JMJD2D* shows only mild HAC metaphase defects, similar to those found in stable cell lines. Transfection of HeLa-HAC-2-4 cells with plasmids expressing TetR-EYFP, TetR-EYFP-*JMJD2D* or TetR-EYFP-*JMJD2D<sup>D195A</sup>*, for 4 days, before fixation and microscopy analysis. Metaphase defects:  $n \geq 53$  transfected cells per condition. Statistical test: Fisher's exact test.

### A HeLa OHAC 2-4

High heterochromatin

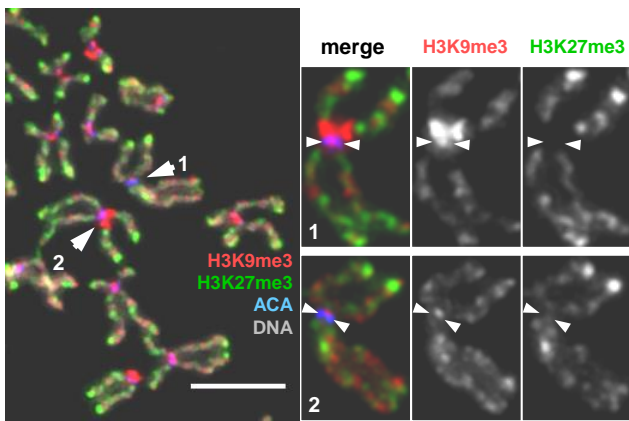

### B HT1080

Low heterochromatin

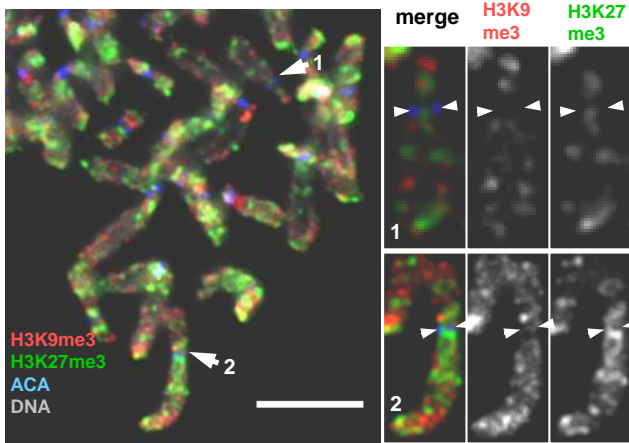

### C Repressive chromatin marks at endogenous (peri)centromeres

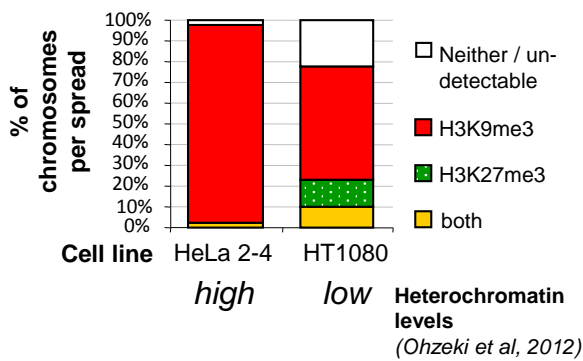

### D DT40 chicken cells

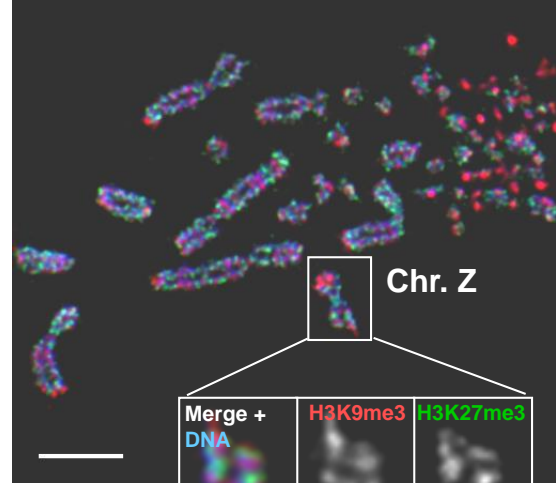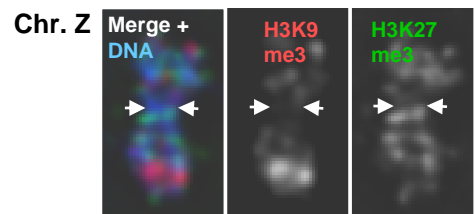

### E DT40 Chr. Z

CENP-A  
H3K27me3  
DNA

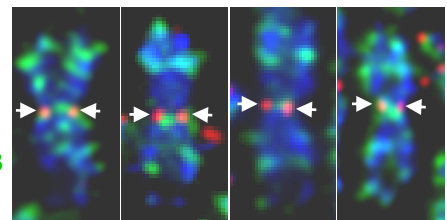

### F DT40 Chr. Z ChIP

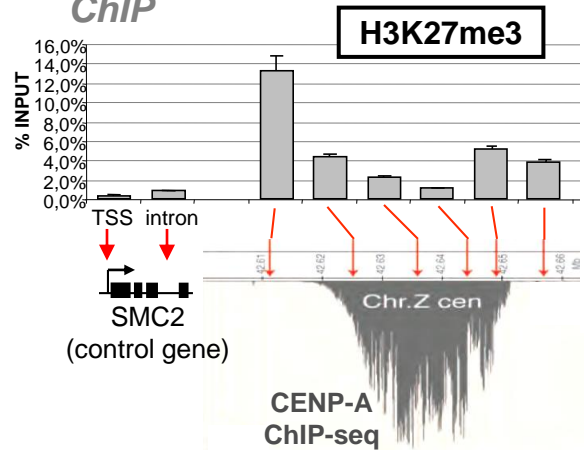

### Figure S3

#### **(Peri)centromeres enriched with H3K27me3 instead of H3K9me3**

- A,B) Comparison of centromere-associated marks H3K9me3 and H3K27me3, between HeLa and HT1080 cells, in chromosome spreads stained by immunofluorescence. HT1080 cells have less chromosomes with centromeric H3K9me3, and some show H3K27me3 associated with their primary constriction. Some HT1080 centromeres show both marks at their centromeric region, although we cannot exclude that, given the resolution limits of the microscope and the fact chromosomes are condensed, these are otherwise separated and well-resolved on the linear DNA molecule instead of co-existing on the same locus. Scale bar: 5  $\mu$ m.
- C) Quantification of A and B, counting if signals (H3K9me3 and H3K27me3) are enriched in the vicinity of the ACA signal. n=39 chromosome spreads per cell line.
- D) Centromere of chr. Z of chicken is poor in H3K9me3, but is apparently enriched for H3K27me3. Chromosome spreads prepared from chicken DT40 #Z3 cells, with immunofluorescence against the epitopes mentioned.
- E) Localization of H3K27me3 in proximity of CENP-A on mitotic chr.Z. Chromosome spreads prepared from chicken DT40 cells, with immunofluorescence against the epitopes mentioned.
- F) ChIP analysis of the centromere of chicken DT40 chr.Z, for H3K27me3. Primer pairs for chr. Z centromere selected from (Shang et al., 2013). The Transcription Start Site (TSS) and intron regions housekeeping SMC2 gene locus were used as a negative control for PcG-like chromatin. 3 biological repeats, error bars: SEM.

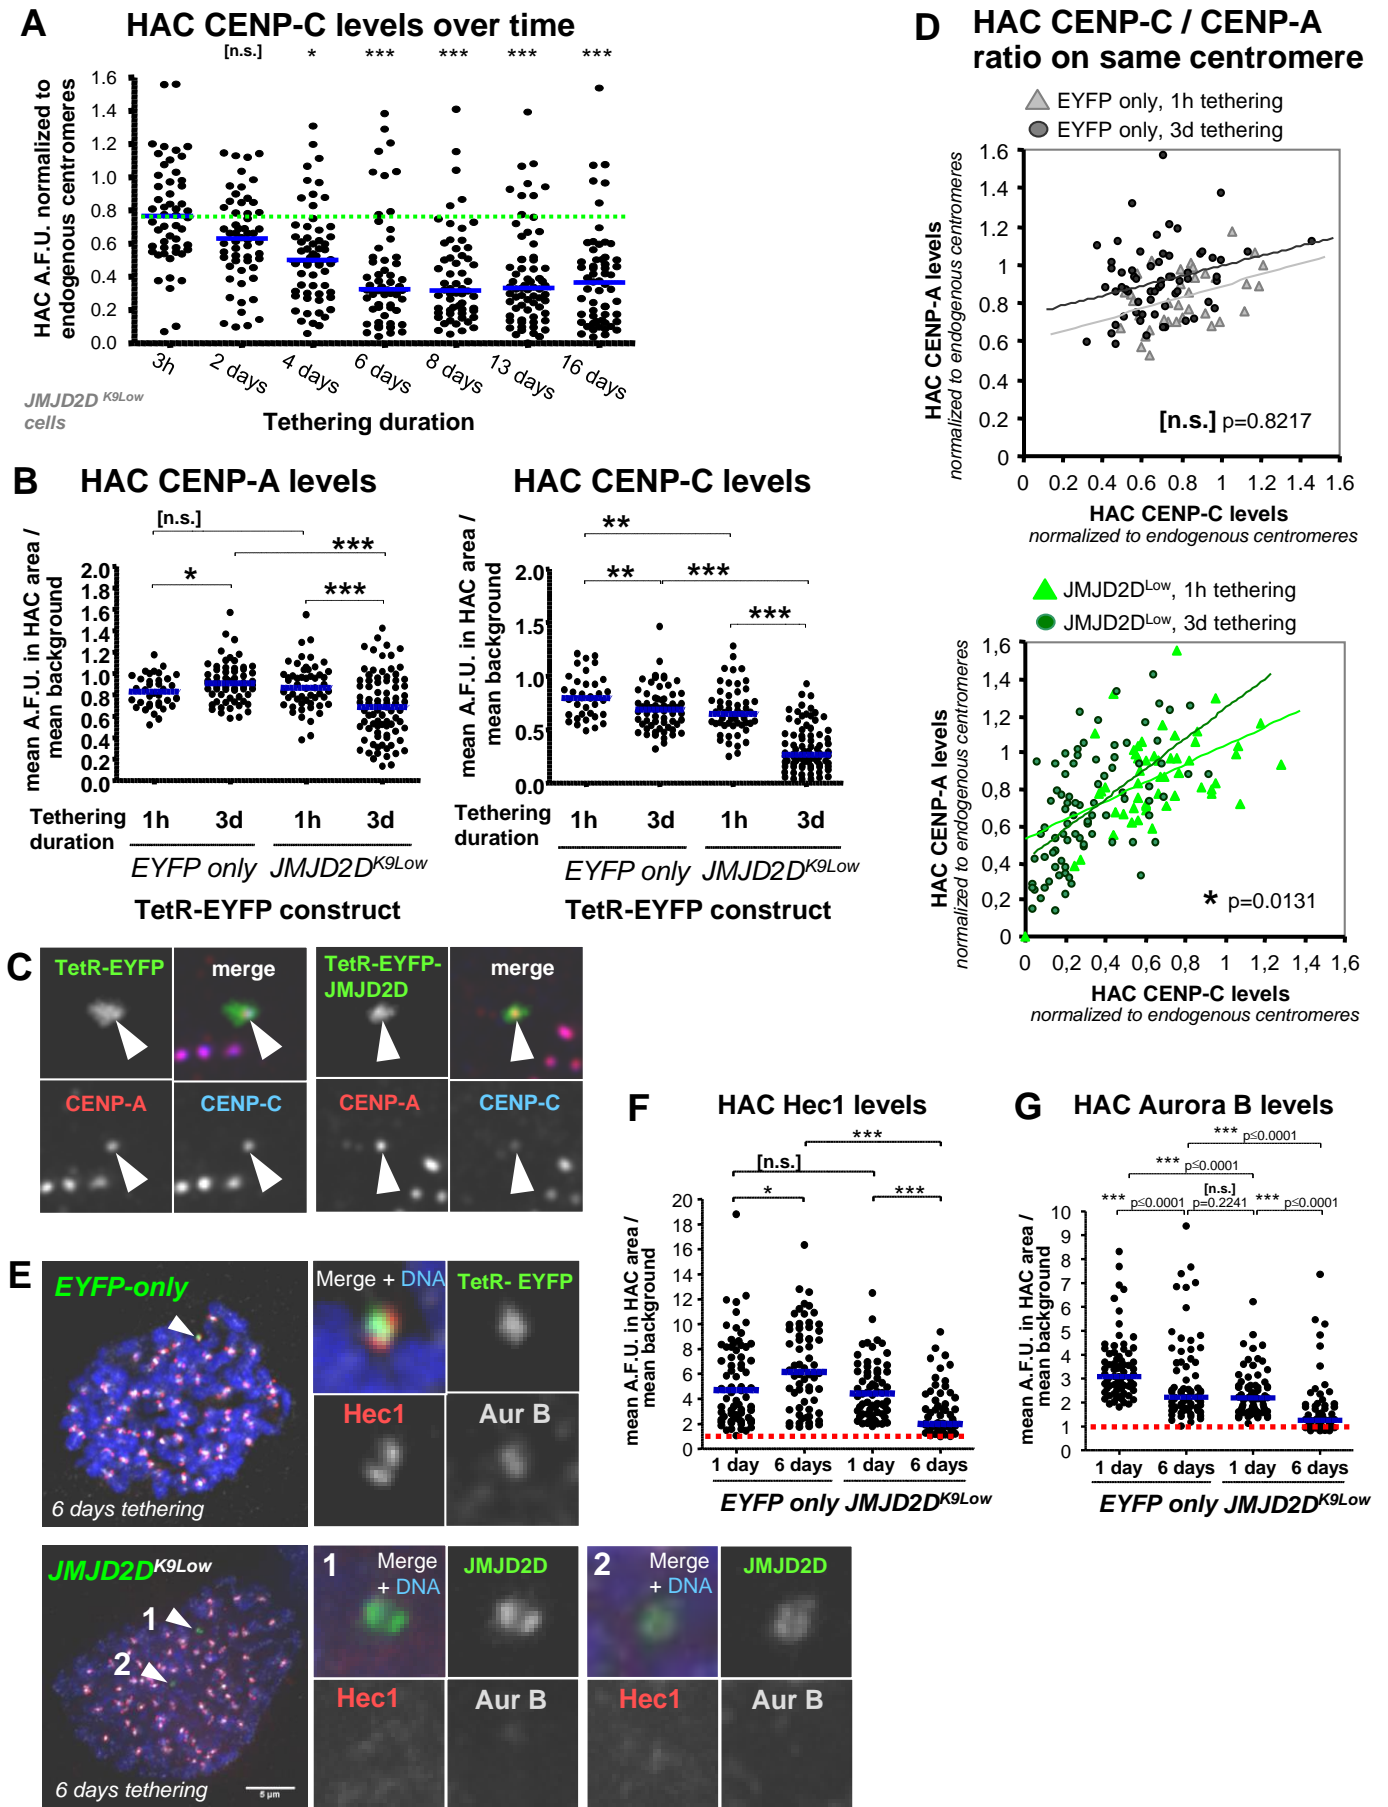

## Figure S4

### **JMJD2D tethering reduces levels of HAC CCAN and kinetochore components**

A) Time-course of long-term JMJD2D tethering in *JMJD2D*<sup>K9Low</sup> cells, as described for Fig. 5A-C, indicating HAC CENP-C is not completely lost. Cells were washed of doxycycline and grown for several days, and samples were taken in intervals and fixed for immunofluorescence and microscopy visualization. Total of two biological replicates, n≥22 interphase cells each. Blue bar indicates median, red dashed line indicates median protein levels at the start of the time-course. Statistical test: Mann-Whitney U.

B,C) Immunofluorescence co-staining against CENP-A and CENP-C in interphase cells, to observe relationship between the two proteins levels and which one decreases faster. After 3 days of JMJD2D tethering, CENP-C levels fall faster than CENP-A.

D) Graphs show CENP-A vs CENP-C signals from panel B, plotted for each individual HAC, with respective linear regression. Total of 2 biological repeats, n=12-40 interphase cells each. Statistical test: *t*-test comparing slopes of linear regressions for each data set.

E,F,G) JMJD2D tethering severely reduces HAC Hec1 and Aurora B levels. *EYFP-only* and *JMJD2D*<sup>K9Low</sup> cells were grown without doxycycline for 6 days to allow the construct to bind to the HAC, and arrested with TN-16 for 2h. We quantified the mean HAC-associated immunofluorescent Hec1 and Aurora B signals, normalized to local background. Total of 3 biological replicates, n≥15-29 prometaphase cells each. Median (blue line), red dashed line indicates average local background level. Statistical test: Mann-Whitney U.



**A** *JMJD2D*<sup>K9Low</sup> cell line  
TetR-EYFP-JMJD2D CENP-C DNA

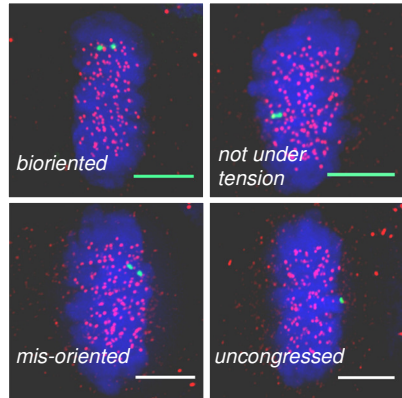

**B** Metaphase defects & their segregation fate

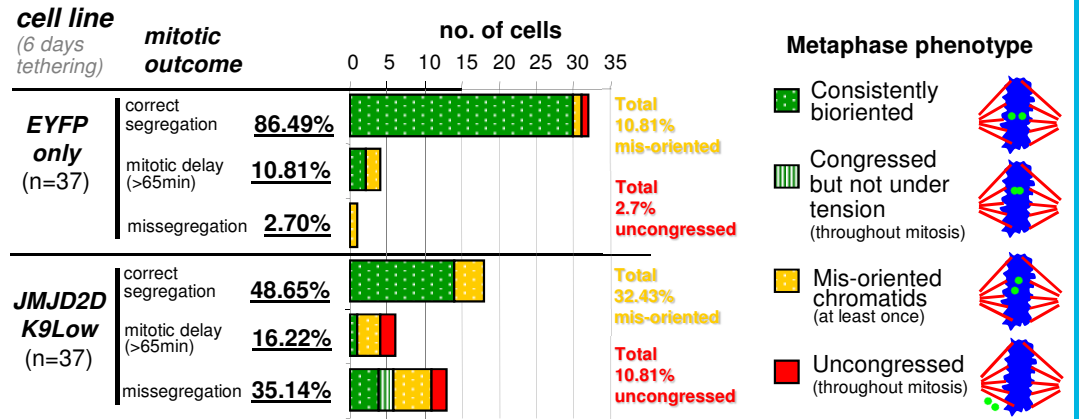

**C** *EYFP-Only* 6 days tethering, live cell analysis

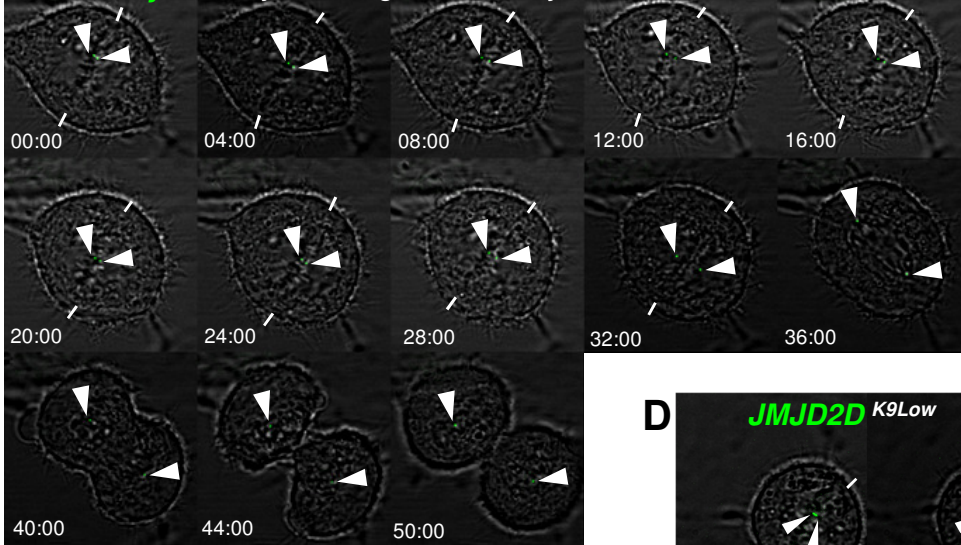

Correct congression, orientation and segregation

**D** *JMJD2D*<sup>K9Low</sup> 6 days tethering

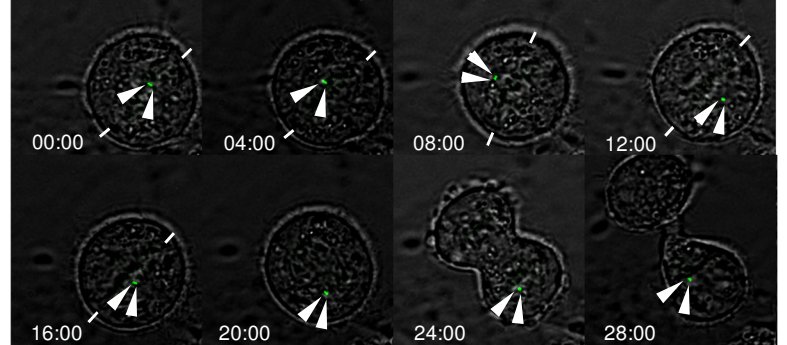

Congression defects, mis-alignment and mis-segregation

**E** *JMJD2D*<sup>K9Low</sup> 6 days tethering

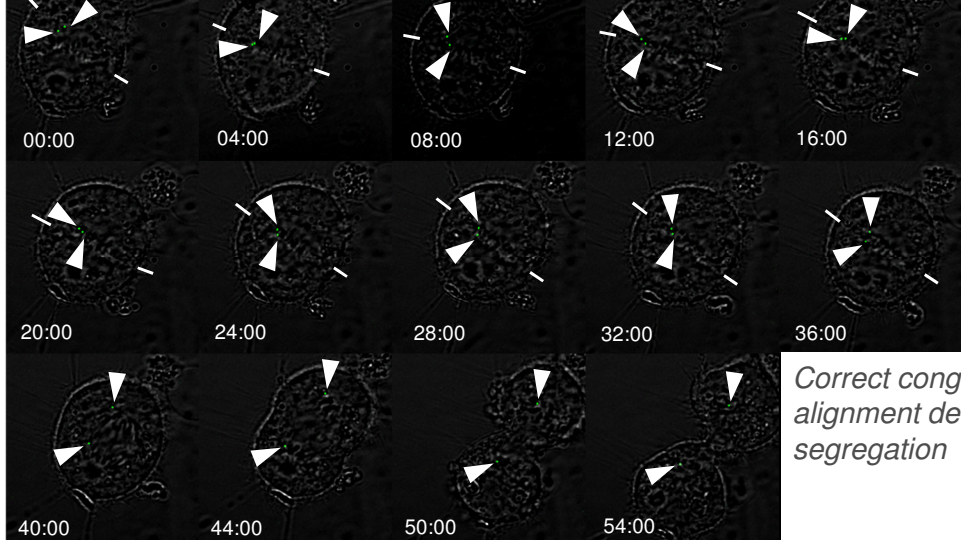

Correct congression, multiple mis-alignment defects but correct segregation

Figure S5

**Live-cell imaging of EYFP-only and *JMJD2D*<sup>K9Low</sup> HACs**

A) Examples of HAC metaphase phenotypes observed in mitotic analyses. Scale bar: 5  $\mu$ m.

B) *JMJD2D*-tethered HACs frequently suffer transient loss of metaphase bi-orientation and misalignment. *EYFP-only* and *JMJD2D*<sup>K9Low</sup> cells were allowed to tether their TetR-fusion proteins to the HAC for 6 days, before being imaged via live cell microscopy. Sum of 2 biological repeats, *EYFP-only* n=20+17, and *JMJD2D*<sup>K9Low</sup> n=30+7 cells each, respectively.

C-E) Representative images of live cell microscopy, of *EYFP-only* and *JMJD2D*<sup>K9Low</sup> cells undergoing mitosis after 6 days of TetR-EYFP or TetR-EYFP-*JMJD2D* tethering, respectively. Arrows denote HAC chromatids (in green), lines indicate plane of metaphase plate. Note how the HACs in *JMJD2D*<sup>K9Low</sup> cells suffer from loss of biorientation and/or congression, but in E it still manages to correctly segregate its sister chromatids.

Supplemental **Table 1****Primer sequences for ChIP and RT-qPCR**

| <b>Primer name</b> | <b>Sequence</b>                  |
|--------------------|----------------------------------|
| TetO-21 fw         | GTGGAATCTGCAAGTGGATATTTG<br>AC   |
| TetO-21 rv         | CTGATAGGGAGAGCTCTGCTGCTA<br>G    |
| Cen21 fw           | GTCTACCTTTTATTTGAATCCCG          |
| Cen21 rv           | AGGGAATGTCTTCCATAAAAACT          |
| Sat2 fw            | TCGCATAGAATCGAATGGAA             |
| Sat2 rv            | GCATTGAGTCCGTGGA                 |
| PABPC1-10kb_fw     | CTAGCATCCGTGGGCCAAGAG            |
| PABPC1-10kb_rv     | CTCTTCCCAACCCAGCAAAT             |
| Actin_fw           | GCCGGGACCTGACTGACTAC             |
| Actin_rv           | AGGCTGGAAGAGTGCCTCAG             |
| SMC2 TSS fw        | AGGGCACCTCCTCCAAGGTCCGC          |
| SMC2 TSS rv        | CCGCCAGCAGCCACCGAACCC            |
| SMC2 intron fw     | TGCTTTGTTCCAGGCACAGCACTT<br>GGC  |
| SMC2 intron rv     | AACTGGGAGGAGCTGTTGACTCC<br>CTGG  |
| Zcen AdjL fw       | GCAGGCAGGGTGCTCATGGAGGG<br>C     |
| Zcen AdjL rv       | GCCCAACTTTGTTGGTGTGTGCTG<br>ACCG |
| Zcen EdgeL fw      | GAGGAGGTTTTGGATGCCCCATCC<br>CTGG |
| Zcen EdgeL rv      | AACCCCTCTTTTACAGGCAGGGTC<br>GCC  |
| Zcen Core fw       | GGCTGCCGGAAGTGCCTGAGCTT<br>GC    |
| Zcen Core rv       | AACTCCTTGCTGAGCTGTGCCAC<br>C     |
| Zcen Gap fw        | GCTTCCTGGGCCAGTCACCCCTT<br>GAC   |
| Zcen Gap rv        | CCTCCTCTAGGCCTGCTCTGACAG<br>CTCC |
| Zcen EdgeR fw      | CCCCGTTCCATTTTCTCTTTCCA<br>GGGTG |

|               |                                    |
|---------------|------------------------------------|
| Zcen EdgeR rv | TGGCCTGGTTCTGTTTCTAATGGG<br>GCAGG  |
| Zcen AdjR fw  | GGTCCATTACCCACAACACTTTCT<br>GCCCCC |
| Zcen AdjR rv  | CGAGAGAGTGTGCCAGCGTGGTT<br>GC      |
| 5cen AdjL fw  | TGGCCCACTGGTGTCTATACTGGG<br>CTCC   |
| 5cen AdjL rv  | TTGGCCCCTTCCAGTGCCAGCC             |
| 5cen EdgeL fw | GGGTGATCGGCCTGGTGGGGG              |
| 5cen EdgeL rv | GCAGCAGTTCCTGGCCTCTGGGC            |
| 5cen Gap fw   | ACACCCAAAACCGCCAGATAGCAA<br>AGTGC  |
| 5cen Gap rv   | GTCAGGCTCCAGCTTCTCGTTGCT<br>GTG    |
| 5cen Core fw  | GCCGAGGAGCTGGGGCTTTTCCA<br>G       |
| 5cen Core rv  | TGAGCTGCCTAGAGTCCCCATCCC<br>G      |
| 5cen EdgeR fw | CTCCTTGCCATCACCTGCTCCTCT<br>GCC    |
| 5cen EdgeR rv | CCAAACCTTGTGCCAGCTTCCCTG<br>GGC    |
| 5cen AdjR fw  | ACCCCCACACCATTCCCCTGCAAG<br>C      |
| 5cen AdjR rv  | CGTGACCCATCCTCTCCACCTCCC<br>C      |
